# Supplementary material
Source: PubMed Central journal article supplement (PMC4947884)
Supplement: rspb20160333supp1.pdf [file rspb20160333supp1.pdf]

**Electronic supplementary material (Teulier et al.)**

**Table S1.** Body and thorax mass of insects used. Our species comparison (part I) included *Bombus impatiens*, *Apis mellifera*, *Vespula vulgaris*, and *Locusta migratoria*. A more detailed investigation of the bumblebee *B. impatiens* (part II) was also conducted. Ratio TM/BM: ratio thorax mass/body mass. Sample sizes are indicated in parentheses. Values are means  $\pm$  sem.

|                         | <b>Part I</b>       |                     |                    |                      | <b>Part II</b>      |
|-------------------------|---------------------|---------------------|--------------------|----------------------|---------------------|
|                         | <i>B. impatiens</i> | <i>A. mellifera</i> | <i>V. vulgaris</i> | <i>L. migratoria</i> | <i>B. impatiens</i> |
|                         | (13)                | (11)                | (11)               | (6)                  | (40)                |
| <b>Body mass (mg)</b>   | 160.8 $\pm$ 13.3    | 86.9 $\pm$ 4.1      | 79.3 $\pm$ 7.0     | 1312.1 $\pm$ 122.9   | 164.0 $\pm$ 7.2     |
| <b>Thorax mass (mg)</b> | 57.1 $\pm$ 4.2      | 32.9 $\pm$ 0.9      | 28.0 $\pm$ 2.5     | 443.9 $\pm$ 54.0     | 56.4 $\pm$ 2.5      |
| <b>Ratio TM/BM</b>      | 0.36 $\pm$ 0.01     | 0.38 $\pm$ 0.01     | 0.35 $\pm$ 0.01    | 0.35 $\pm$ 0.01      | 0.35 $\pm$ 0.01     |

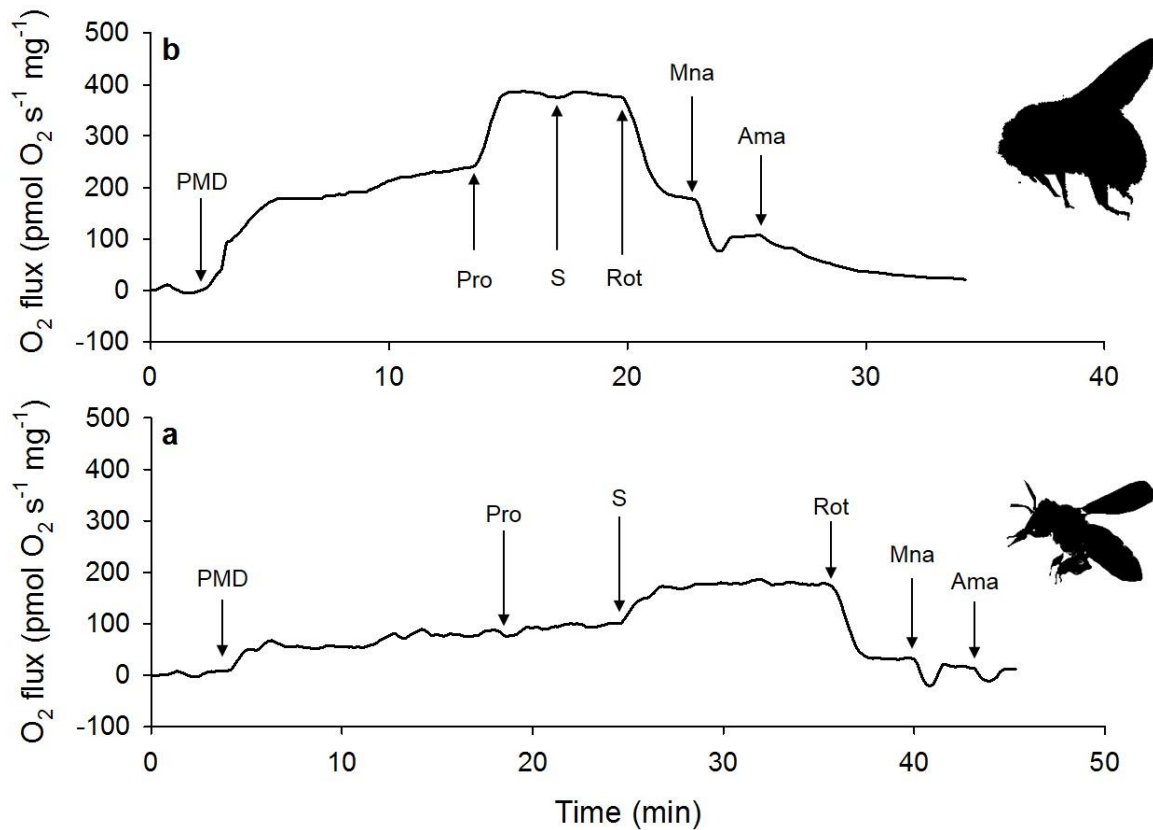

**Figure S1.** Traces of oxygen flux ( $\text{pmolO}_2 \text{ s}^{-1} \text{ mg}^{-1}$ ) obtained using sequential addition of substrates and inhibitors performed on thoracic flight muscle fibers of the bumblebee *Bombus impatiens* (A) and the honeybee *Apis mellifera* (B). The following substrates were added: pyruvate + malate + ADP (PMD), proline (Pro), and succinate (S), followed by the inhibitors rotenone (R), malonate (Mna), and antimycin A (Ama).

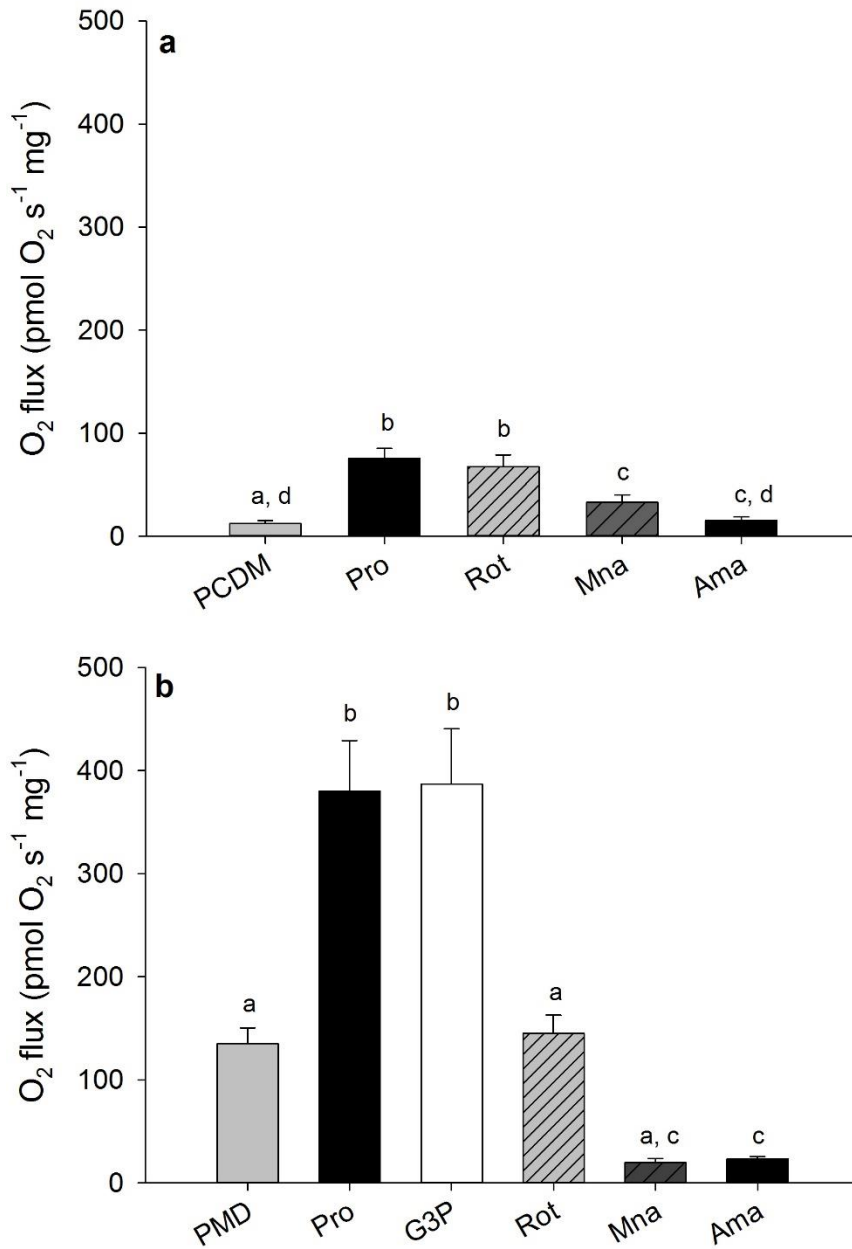

**Figure S2.** Effects of palmitoyl-carnitine (A) and glycerol-3-phosphate (B) on respiration rates (pmol O<sub>2</sub> s<sup>-1</sup> mg<sup>-1</sup>) measured in flight muscle fibers of bumblebees (*Bombus impatiens*). PCDM: palmitoyl-carnitine + ADP + malate, PMD: pyruvate + malate + ADP, Pro: proline, G3P: glycerol-3-phosphate, Rot: rotenone, Mna: malonate, Ama: antimycin A. Values presented are means + sem. Bars with different letters are significantly different (P<0.05).

**Table S2.** Respiration rates measured in flight muscle fibers of four insect species. Oxygen fluxes ( $\text{pmol O}_2 \text{ s}^{-1} \text{ mg}^{-1}$ ) were determined after successive addition of pyruvate + malate + ADP (PMD), proline (PMD + Pro), succinate (PMD + Pro + S), rotenone (Rot), malonate (Mna), and antimycin A (Ama).

| Species                   | Substrates and inhibitors |              |              |              |            |            |
|---------------------------|---------------------------|--------------|--------------|--------------|------------|------------|
|                           | PMD                       | PMD + Pro    | PMD + Pro +S | Rot          | Mna        | Ama        |
| <i>Apis mellifera</i>     | 122.46±24.33              | 137.88±25.81 | 192.76±25.43 | 49.98±10.07  | 22.18±18   | 18.14±2.60 |
| <i>Bombus impatiens</i>   | 124.56±20.68              | 291.71±41.70 | 312.20±42.44 | 155.59±19.45 | 20.72±3.82 | 19.55±1.94 |
| <i>Vespula vulgaris</i>   | 117.62±13.12              | 256.49±37.34 | 280.18±41.53 | 120.49±20.23 | 16.21±2.41 | 14.50±1.03 |
| <i>Locusta migratoria</i> | 74.98±15.25               | 74.14±15.30  | 129.78±25.37 | 41.49±10.52  | 12.63±2.82 | 3.73±0.66  |

**Table S3.** Respiration rates measured in flight muscle fibers of *Bombus impatiens*. Oxygen fluxes ( $\text{pmol O}_2 \text{ s}^{-1} \text{ mg}^{-1}$ ) were determined after successive addition of substrates and inhibitors using various protocols. Pyruvate + malate + ADP (PMD), proline (Pro), succinate (S), rotenone (Rot), malonate (Mna), and antimycin A (Ama).

| Protocol | Substrates and inhibitors |              |              |               |              |            |            |
|----------|---------------------------|--------------|--------------|---------------|--------------|------------|------------|
|          | PDM                       | PDM + Pro    | PDM + S      | PDM + S + Pro | Rot          | Mna        | Ama        |
| #1       | 145.28±13.84              | 317.03±33.06 | -            | -             | 173.55±24.06 | 9.52±1.76  | 15.06±3.08 |
| #2       | 160.49±15.77              | -            | 246.55±24.30 | -             | 61.17±6.79   | 18.01±3.40 | 19.22±1.99 |
| #3       | 149.74±10.73              | -            | 194.87±17.38 | 298.22±23.38  | 175.02±38.31 | 20.44±4.87 | 18.41±1.79 |

**Table S4.** Respiration rates measured in flight muscle fibers of *Bombus impatiens*. Oxygen fluxes ( $\text{pmol O}_2 \text{ s}^{-1} \text{ mg}^{-1}$ ) were determined after successive addition of substrates and inhibitors using various protocols. Malate + ADP (MD), palmitoyl-carnitine + ADP + malate (PCDM), pyruvate + malate + ADP (PMD), proline (Pro), glycerol-3-phosphate (G3P), rotenone (Rot), malonate (Mna), and antimycin A (Ama).

| Protocol | Substrates and inhibitors |            |              |              |              |              |            |            |
|----------|---------------------------|------------|--------------|--------------|--------------|--------------|------------|------------|
|          | DM                        | PCDM       | PDM          | Pro          | G3P          | Rot          | Mna        | Ama        |
| #4       | 47.18±8.14                | -          | -            | 108.39±7.47  | -            | 85.99±7.42   | 35.83±2.78 | 10.42±3.20 |
| #5       | -                         | 12.36±2.83 | -            | 75.39±9.78   | -            | 67.72±11.26  | 32.91±7.24 | 15.28±3.60 |
| #6       | -                         | -          | 135.07±15.49 | 380.03±48.99 | 386.97±53.52 | 145.15±17.70 | 19.88±3.95 | 23.14±2.53 |
